# Supplementary material for: Lacticaseicin 30 and Colistin as a Promising Antibiotic Formulation against Gram-Negative β-Lactamase-Producing Strains and Colistin-Resistant Strains
Source: MDPI journal article supplement (doi:10.3390/antibiotics11010020), 2021-12-24
Supplement: s1 [file s1]

## Supplementary Materials

**Table S1.** Antibigrams of clinical Gram-negative bacteria used in this work.

|                                           | <i>E. cloacae</i> H51 | <i>E. coli</i> H45 | <i>E. coli</i> H52 | <i>E. coli</i> H66 | <i>K. oxytoca</i> H40 | <i>K. pneumoniae</i> H71 | <i>K. variicola</i> H77 | <i>K. pneumoniae</i> H79 | <i>K. pneumoniae</i> H87 | <i>S. enterica</i> Enteritidis H10 | <i>S. enterica</i> Typhimurium H97 |
|-------------------------------------------|-----------------------|--------------------|--------------------|--------------------|-----------------------|--------------------------|-------------------------|--------------------------|--------------------------|------------------------------------|------------------------------------|
| <b><u>Penicillins</u></b>                 |                       |                    |                    |                    |                       |                          |                         |                          |                          |                                    |                                    |
| Ampicilin                                 | R                     | R                  | R                  | R                  | R                     | R                        | R                       | R                        | R                        | S                                  | R                                  |
| Amoxicillin/<br>clavulanic acid           | R                     | I                  | R                  | R                  | S                     | R                        | S                       | R                        | R                        | S                                  | R                                  |
| Ticarcillin                               | R                     | R                  | R                  | R                  | R                     | R                        | R                       | R                        | R                        | S                                  | R                                  |
| Ticarcillin/ clavulanic acid              | R                     | I                  | R                  | R                  | R                     | R                        | I                       | R                        | R                        | S                                  | R                                  |
| Temocillin                                | -                     | S                  | S                  | -                  | -                     | -                        | -                       | R                        | -                        | -                                  | -                                  |
| Piperacillin                              | R                     | R                  | R                  | R                  | R                     | R                        | R                       | R                        | R                        | S                                  | R                                  |
| Piperacillin/ tazobactam                  | -                     | S                  | I                  | R                  | R                     | R                        | S                       | R                        | R                        | S                                  | S                                  |
| Imipenem                                  | S                     | S                  | S                  | S                  | S                     | R                        | S                       | S                        | S                        | S                                  | S                                  |
| Ertapenem                                 | S                     | S                  | S                  | S                  | S                     | R                        | S                       | S                        | S                        | S                                  | -                                  |
| <b><u>Cephalosporins</u></b>              |                       |                    |                    |                    |                       |                          |                         |                          |                          |                                    |                                    |
| Cefoxitin                                 | R                     | S                  | R                  | R                  | S                     | R                        | S                       | S                        | R                        | S                                  | S                                  |
| Cefotaxime                                | R                     | S                  | S                  | S                  | R                     | R                        | R                       | R                        | R                        | S                                  | S                                  |
| Ceftriaxone                               | S                     | S                  | S                  | S                  | R                     | R                        | R                       | R                        | R                        | S                                  | S                                  |
| Ceftazidime                               | R                     | S                  | I                  | S                  | R                     | R                        | S                       | R                        | R                        | S                                  | S                                  |
| Cefepim                                   | R                     | S                  | S                  | S                  | S                     | R                        | S                       | R                        | R                        | S                                  | S                                  |
| <b><u>Oral cephalosporins</u></b>         |                       |                    |                    |                    |                       |                          |                         |                          |                          |                                    |                                    |
| Cefixime                                  | R                     | S                  | R                  | R                  | R                     | R                        | R                       | R                        | R                        | S                                  | S                                  |
| <b><u>Aminoglycosides</u></b>             |                       |                    |                    |                    |                       |                          |                         |                          |                          |                                    |                                    |
| Tobramycin                                | -                     | S                  | S                  | S                  | R                     | R                        | R                       | R                        | R                        | -                                  | -                                  |
| Amikacin                                  | -                     | S                  | S                  | S                  | S                     | -                        | I                       | I                        | I                        | -                                  | S                                  |
| Gentamycin                                | R                     | S                  | S                  | S                  | R                     | R                        | R                       | R                        | R                        | -                                  | R                                  |
| <b><u>Tetracyclines</u></b>               |                       |                    |                    |                    |                       |                          |                         |                          |                          |                                    |                                    |
| Tigecycline                               | -                     | S                  | S                  | S                  | R                     | -                        | S                       | I                        | R                        | S                                  | -                                  |
| <b><u>Polypeptides</u></b>                |                       |                    |                    |                    |                       |                          |                         |                          |                          |                                    |                                    |
| Colistin                                  | R                     | R                  | R                  | R                  | R                     | R                        | R                       | R                        | R                        | R                                  | R                                  |
| <b><u>Sulfonamide and combination</u></b> |                       |                    |                    |                    |                       |                          |                         |                          |                          |                                    |                                    |
| Trimethoprim                              | R                     | R                  | S                  | S                  | R                     | -                        | R                       | R                        | R                        | S                                  |                                    |
| Trimethoprim/<br>sulfamethoxazole         | R                     | R                  | S                  | S                  | R                     | -                        | R                       | R                        | S                        | S                                  | R                                  |
| <b><u>Nitrofurans</u></b>                 |                       |                    |                    |                    |                       |                          |                         |                          |                          |                                    |                                    |
| Nitrofurantoin                            | -                     | S                  | S                  | S                  | R                     | -                        | -                       | R                        | -                        | R                                  | S                                  |
| <b><u>Quinolones</u></b>                  |                       |                    |                    |                    |                       |                          |                         |                          |                          |                                    |                                    |
| Nalidixic acid                            | R                     | -                  | S                  | S                  | R                     | R                        | R                       | R                        | -                        | R                                  | S                                  |
| Ofloxacin                                 | -                     | -                  | S                  | S                  | S                     | R                        | R                       | R                        | -                        | R                                  | S                                  |
| Levofloxacin                              | -                     | -                  | S                  | S                  | S                     | R                        | R                       | R                        | -                        | R                                  | -                                  |
| Ciprofloxacin                             | -                     | -                  | S                  | S                  | S                     | R                        | R                       | R                        | -                        | R                                  | S                                  |
| <b><u>Diverses</u></b>                    |                       |                    |                    |                    |                       |                          |                         |                          |                          |                                    |                                    |
| Fosfomycin                                | -                     | S                  | -                  | -                  | -                     | -                        | -                       | -                        | -                        | -                                  | S                                  |

Legend. R : Resistant; I : Intermediary; S: sensitive (-): not determined.
